# Supplementary material for: Mucopenetrating Janus Nanoparticles For Field-Coverage Oral Cancer Chemoprevention
Source: PubMed Central journal article supplement (PMC10036282; doi:10.1007/s11095-022-03465-x), 2023-01-12

**Medium**

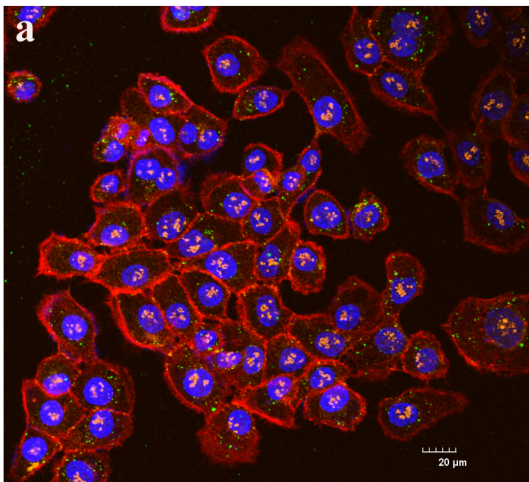

**PBS**

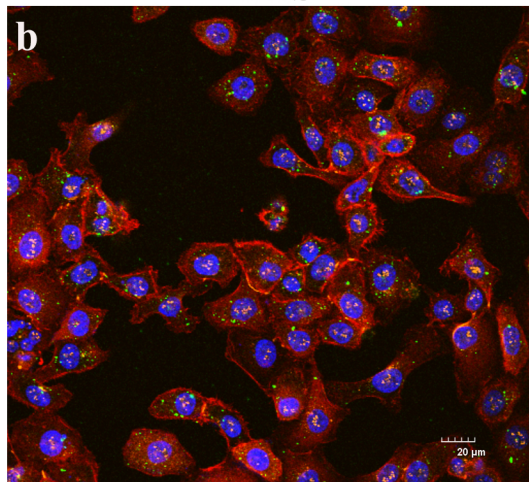

**Saliva**

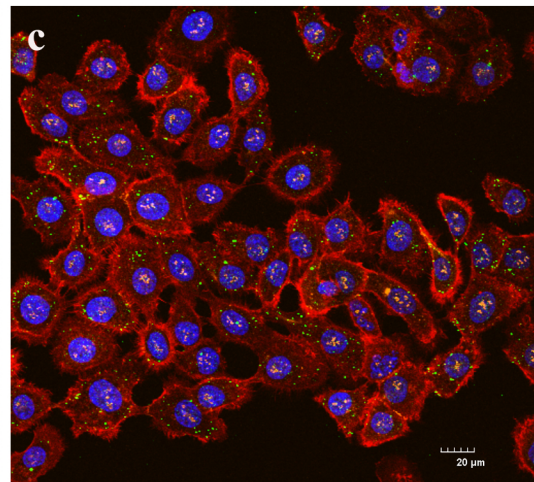

Supplement: 11095_2022_3465_MOESM1_ESM.pdf [file 11095_2022_3465_MOESM1_ESM.pdf]
